# Supplementary material for: Prognostic and Predictive Molecular Markers in Cholangiocarcinoma
Source: MDPI journal article supplement (doi:10.3390/cancers14041026), 2022-02-17
Supplement: s1 [file s1]

**Table S1.** Overview of current and ongoing clinical trials for therapies targeting IDH1/2 in CCA.

| Drug                                          | Target         | Indication                                                              | Clinical trial           | Recruitment status / Results                                                                     | Primary endpoint         |
|-----------------------------------------------|----------------|-------------------------------------------------------------------------|--------------------------|--------------------------------------------------------------------------------------------------|--------------------------|
| <b>Isocitrate dehydrogenase 1/2 (IDH 1/2)</b> |                |                                                                         |                          |                                                                                                  |                          |
| Ivosidenib (AG-120)                           | IDH1 inhibitor | Advanced CCA                                                            | NCT02989857 [150]        | - Improved PFS<br>- Increased OS (when adjusted for crossover)<br>- Well safety and tolerability | PFS                      |
|                                               |                | Advanced solid tumors including CCA                                     | NCT02073994 (phase I)    | Active, not recruiting                                                                           | Safety/tolerability, MTD |
|                                               |                | Advanced CCA                                                            | NCT04088188 (phase I)    | Recruiting                                                                                       | DLT                      |
| Olutasidenib (FT-2102)                        | IDH1 inhibitor | Solid tumors including hepatobiliary tumors and iCCA                    | NCT03684811 (phase I/II) | Active, not recruiting                                                                           | DLT, ORR                 |
| Enasidenib (AG-221)                           | IDH2 inhibitor | Advanced solid tumors including iCCA                                    | NCT02273739 (phase I)    | Completed                                                                                        | TEAE, DLT, ECOG status   |
| Olaparib (AZD2281)                            | PARP inhibitor | Advanced solid tumors including CCA                                     | NCT03212274 (phase II)   | Recruiting                                                                                       | ORR                      |
|                                               |                | Refractory or advanced CCA                                              | NCT03878095 (phase II)   | Recruiting                                                                                       | ORR                      |
|                                               |                | Metastatic biliary tract cancer with Aberrant DNA repair gene mutations | NCT04042831 (phase II)   | Recruiting                                                                                       | ORR                      |
|                                               |                | Advanced biliary tract cancer                                           | NCT04298021 (phase II)   | Recruiting                                                                                       | DCR                      |
|                                               |                | Advanced CCA                                                            | NCT04306367 (phase II)   | Recruiting                                                                                       | ORR                      |
|                                               |                | Solid tumors including CCA                                              | NCT03991832 (phase II)   | Recruiting                                                                                       | ORR, DCR                 |
|                                               |                | Advanced iCCA                                                           | NCT02428855 (phase II)   | Completed                                                                                        | ORR                      |
| Dasatinib                                     | IDH inhibitor  | Advanced iCCA                                                           | NCT02428855 (phase II)   | Completed                                                                                        | ORR                      |

PFS: progression free survival; MTD: maximum tolerated dose; DLT: dose limiting toxicity; ORR: objective response rate; TEAE: treatment-emergent adverse events; ECOG: Eastern Cooperative Oncology Group; DCR: disease control rate; TTP: time to progression.

**Table S2.** Overview of current and ongoing clinical trials for therapies targeting KRAS in CCA.

| Drug                          | Target            | Indication                             | Clinical trial                     | Recruitment status / Results                                                                      | Primary endpoint                       |
|-------------------------------|-------------------|----------------------------------------|------------------------------------|---------------------------------------------------------------------------------------------------|----------------------------------------|
| <b>KRAS signaling pathway</b> |                   |                                        |                                    |                                                                                                   |                                        |
| Selumetinib (AZD6244)         | MEK 1/2 inhibitor | Advanced biliary tract cancer          | NCT00553332 (phase II) [153]       | - Acceptable tolerability<br>- Promising anti-tumor activity                                      | ORR                                    |
|                               |                   |                                        | NCT01242605 (phase I) [181]        | - Modest efficacy<br>- Acceptable tolerability                                                    | Safety and tolerability                |
|                               |                   |                                        | NCT02151084 (phase II)             | Active, not recruiting                                                                            | ORR                                    |
| Trametinib                    | MEK inhibitor     | Advanced biliary cancer                | NCT02042443 (phase II) [152]       | Early termination due to no therapeutic response                                                  | OS                                     |
|                               |                   |                                        | NCT01943864 (phase II) [182]       | - Well tolerated<br>- Primary endpoint not met                                                    | Non-progressive disease after 12 weeks |
|                               |                   |                                        | NCT04566133 (phase II)             | Recruiting                                                                                        | PFS                                    |
| Dabrafenib                    | BRAF inhibitor    | Multiple advanced tumors including CCA | NCT02034110 (phase II) [154]       | - 51% investigator-assessed ORR<br>- 47% independent reviewer-assessed ORR<br>- Good tolerability | ORR                                    |
|                               |                   |                                        | NCT02465060 (phase II)             | Recruiting                                                                                        | ORR                                    |
| GSK1120212                    | MEK inhibitor     | Advanced solid tumors, including CCA   | NCT01438554 (phase I)              | Completed                                                                                         | MTD, adverse events                    |
| Refametinib                   | MEK inhibitor     | Advanced biliary tract cancer          | NCT02346032 (phase II)             | Completed                                                                                         | ORR                                    |
| MEK162                        | MEK inhibitor     | Advanced biliary cancer                | NCT01828034 (phase I/II)           | Completed                                                                                         | MTD, PFS, ORR                          |
|                               |                   |                                        | NCT04764084 (phase I)              | Not yet recruiting                                                                                | DLT                                    |
|                               |                   | Advanced CCA                           | NCT04895046 (phase II; recruiting) | Recruiting                                                                                        | PFS                                    |

PFS: progression free survival; OS: overall survival; MTD: maximum tolerated dose; DLT: dose limiting toxicity; ORR: objective response rate.

**Table S3.** Overview of current and ongoing clinical trials for therapies targeting FGFR in CCA.

| Drug                                   | Target                    | Indication                                                   | Clinical trial                        | Recruitment status / Results                                             | Primary endpoint      |
|----------------------------------------|---------------------------|--------------------------------------------------------------|---------------------------------------|--------------------------------------------------------------------------|-----------------------|
| <b>Fibroblast growth factor (FGFR)</b> |                           |                                                              |                                       |                                                                          |                       |
| Infigratinib (BGJ398)                  | FGFR 1-3 kinase inhibitor | Advanced CCA                                                 | NCT02150967 (phase II) [113-115]      | - Acceptable tolerability<br>- 14.8% ORR with 75.4% disease control rate | ORR                   |
|                                        |                           | Advanced CCA                                                 | NCT03773302 (phase III) [116]         | Recruiting                                                               | PFS                   |
|                                        |                           | Advanced solid tumors including CCA                          | NCT04233567 (phase II)                | Recruiting                                                               | ORR                   |
| Erdafitinib (JNJ-42756493)             | Pan-FGFR kinase inhibitor | Advanced solid tumors including CCA                          | NCT01703481 (phase I) [108] (phase I) | Well tolerability                                                        | MTD                   |
|                                        |                           | Advanced NSCLC, urothelial cancer, esophageal cancer and CCA | NCT02699606 (phase II)                | Active, not recruiting                                                   | ORR                   |
| Derazantinib (ARQ 087)                 | FGFR 1-3 kinase inhibitor | Advanced solid tumors including iCCA                         | NCT01752920 (phase I/II) [112]        | - Well tolerability<br>- Anti-tumor activity                             | TEAE                  |
|                                        |                           | Advanced iCCA                                                | NCT03230318 (phase II)                | Recruiting                                                               | ORR, PFS              |
| Futibatinib (TAS120)                   | FGFR 1-4 kinase inhibitor | Advanced solid tumors including CCA                          | NCT02052778 (phase II) [111]          | - Efficacy in iCCA with FGFR2 aberrations<br>- Acceptable tolerability   | Safety and RPTD, ORR  |
|                                        |                           | Advanced or recurrent iCCA                                   | NCT04093362 (phase III) [117]         | Recruiting                                                               | PFS                   |
| CH5183284/Debio 1347                   | FGFR 1-3 kinase inhibitor | Advanced solid tumors including CCA                          | NCT01948297 (phase I) [103]           | - Acceptable tolerability<br>- Preliminary efficacy                      | DLT, TEAE, TESAE      |
| Pemigatinib (INCB054828)               | FGFR 1-3 kinase inhibitor | Advanced or unresectable CCA                                 | NCT02924376 [183] (phase II)          | Preliminary efficacy                                                     | ORR                   |
|                                        |                           |                                                              | NCT03656536 (phase III) [118]         | Recruiting                                                               | PFS                   |
|                                        |                           |                                                              | NCT04256980 (phase II)                | Active, not recruiting                                                   | OSS                   |
|                                        |                           |                                                              | NCT04088188 (phase I)                 | Recruiting                                                               | DLT                   |
|                                        |                           | Advanced malignancies including CCA                          | NCT02393248 (phase I/II)              | Active, not recruiting                                                   | MTD, pharmacodynamics |
| E7090                                  | FGFR 1-3 kinase inhibitor | Advanced CCA                                                 | NCT04238715 (phase II)                | Recruiting                                                               | ORR                   |

|              |                                   |                    |     |
|--------------|-----------------------------------|--------------------|-----|
| Advanced CCA | NCT01752920<br>(phase I/II) [112] | Not yet recruiting | DLT |
|              | NCT03230318<br>(phase II)         | Recruiting         | PFS |

PFS: progression free survival; MTD: maximum tolerated dose; DLT: dose limiting toxicity; ORR: objective response rate; RPTD: recommended phase two dose; TEAE: treatment-emergent adverse events; TEASE: treatment-emergent serious adverse events. NSCLC: non-small cell lung cancer.

**Table S4.** Overview of current and ongoing clinical trials for therapies targeting EGFR and VEGF in CCA.

| Drug                                  | Target                   | Indication                            | Clinical trial                       | Recruitment status / Results                                                            | Primary endpoint          |
|---------------------------------------|--------------------------|---------------------------------------|--------------------------------------|-----------------------------------------------------------------------------------------|---------------------------|
| <b>Epidermal growth factor (EGFR)</b> |                          |                                       |                                      |                                                                                         |                           |
| Erlotinib<br>(Tarceva)                | Selective EGFR inhibitor | Advanced CCA                          | NCT00350753<br>(phase II) [127]      | - Efficient, good disease control rate<br>- Well tolerable                              | TTP, ORR                  |
|                                       |                          | Advanced CCA                          | NCT00356889<br>(phase II) [128]      | - Anti-tumor activity<br>- Good tolerability                                            | ORR                       |
|                                       |                          | Advanced biliary tract cancer         | NCT00987766<br>(phase I) [184]       | - Promising anti-tumor activity<br>- Acceptable tolerability                            | MTD, RPTD                 |
|                                       |                          | Advanced CCA, pancreatic cancer       | NCT00266097<br>(phase I)             | Completed                                                                               | MTD                       |
|                                       |                          | Advanced biliary tract cancer, HCC    | NCT00532441<br>(phase II) [185]      | - Increased PFS<br>- OS comparable between erlotinib mono and erlotinib with doclitaxel | PFS                       |
|                                       |                          | Advanced biliary tract cancer         | NCT01149122<br>(phase III) [135,186] | - No significant difference in PFS<br>- Early tumor shrinkage correlates with PFS       | PFS                       |
|                                       |                          | Advanced CCA, gallbladder cancer      | NCT01093222<br>(phase II)            | Completed                                                                               | PFS                       |
|                                       |                          | Advanced CCA, gallbladder cancer, HCC | NCT00033462<br>(phase II)            | Completed                                                                               | Rate of patients with PFS |
|                                       |                          | Metastatic biliary tract cancer       | NCT03110484<br>(phase II)            | Not yet recruiting                                                                      | ORR                       |
|                                       |                          | Advanced CCA, HCC                     | NCT00101036<br>(phase II) [130]      | - Well tolerability<br>- No clinical activity                                           | ORR                       |

|                         |                                        |                                                                                                                          |                                 |                                                                    |                                                                                      |
|-------------------------|----------------------------------------|--------------------------------------------------------------------------------------------------------------------------|---------------------------------|--------------------------------------------------------------------|--------------------------------------------------------------------------------------|
| Afatinib<br>(BIBW 2992) | Inhibitor of<br>EGFR and Her-<br>2/neu | Advanced CCA                                                                                                             | NCT00107536<br>(phase II) [131] | Terminated due<br>to futility                                      | ORR                                                                                  |
|                         |                                        |                                                                                                                          | NCT01679405<br>(phase I) [187]  | Terminated due<br>to futility                                      | TEAE                                                                                 |
|                         |                                        | Advanced solid<br>tumors<br>including CCA                                                                                | NCT02451553<br>(phase I)        | Active, not<br>recruiting                                          | TEAE, MTD,<br>DLT, RPTD                                                              |
| Trastuzumab             | Her-2/neu<br>monoclonal<br>antibody    | Advanced CCA                                                                                                             | NCT03613168<br>(phase II)[188]  | Promising<br>clinical activity                                     | ORR, TEAS                                                                            |
|                         |                                        | Advanced solid<br>tumors<br>including CCA                                                                                | NCT02999672<br>(phase II);      | Completed                                                          | ORR                                                                                  |
|                         |                                        | Advanced solid<br>tumors<br>including CCA                                                                                | NCT04579380<br>(phase II)       | Recruiting                                                         | ORR                                                                                  |
|                         |                                        | Advanced CCA                                                                                                             | NCT04722133<br>(phase II)       | Recruiting                                                         | ORR                                                                                  |
|                         |                                        | Advanced<br>gastrointestinal<br>cancers<br>including CCA                                                                 | NCT04430738<br>(phase I/II)     | Recruiting                                                         | DLT, TEAS,<br>incidence of<br>laboratory<br>abnormalities<br>and dose<br>alterations |
|                         |                                        | Advanced solid<br>tumors<br>including CCA                                                                                | NCT02091141<br>(phase II) [137] | - Well<br>tolerability<br>- Modest<br>response rate                | ORR                                                                                  |
|                         |                                        | Vascular endothelial growth factor (VEGF)                                                                                |                                 |                                                                    |                                                                                      |
| Bevacizumab             | VEGF<br>monoclonal<br>antibody         | Advanced CCA                                                                                                             | NCT00350753<br>(phase II) [127] | - Efficient, good<br>disease control<br>rate                       | TTP, ORR                                                                             |
|                         |                                        |                                                                                                                          |                                 | - Well tolerable                                                   |                                                                                      |
|                         |                                        |                                                                                                                          | NCT00356889<br>(phase II) [128] | - Anti-tumor<br>activity                                           | ORR                                                                                  |
|                         |                                        |                                                                                                                          |                                 | - Well tolerable                                                   |                                                                                      |
|                         |                                        |                                                                                                                          | NCT00361231<br>(phase II)       | Competed                                                           | PFS                                                                                  |
|                         |                                        |                                                                                                                          | NCT01206049<br>(phase II)       | Completed                                                          | PFS                                                                                  |
|                         |                                        |                                                                                                                          | NCT01007552<br>(phase II) [141] | No survival<br>benefit<br>compared to<br>gemcitabine/cis<br>platin | PFS                                                                                  |
|                         |                                        |                                                                                                                          | NCT04984980<br>(phase II)       | Recruiting                                                         | Conversion rate                                                                      |
|                         | NCT05052099<br>(phase Ib/II)           | Recruiting                                                                                                               | ORR                             |                                                                    |                                                                                      |
| Ramucirumab             | VEGFR2<br>monoclonal<br>antibody       | Advanced<br>gastric or<br>gastroesophage<br>al junction<br>adenocarcinom<br>a, NSCLC,<br>urothelium<br>carcinoma,<br>CCA | NCT02443324<br>(phase I) [189]  | - Acceptable<br>tolerability<br>- No<br>improvement in<br>OS       | DLT                                                                                  |

|          |                  |               |                              |                                                              |               |
|----------|------------------|---------------|------------------------------|--------------------------------------------------------------|---------------|
| Apatinib | VEGFR2 inhibitor | Advanced CCA  | NCT02520141 (phase II)       | Active, not recruiting                                       | PFS           |
|          |                  |               | NCT02711553 (phase II)       | Active, not recruiting                                       | PFS           |
|          |                  | Advanced iCCA | NCT03251443 (phase II) [190] | - Promising anti-tumor activity<br>- Acceptable tolerability | PFS, ORR, DCR |
|          |                  |               | NCT03521219 (phase II) [191] | - Improved ORR<br>- Acceptable tolerability                  | DCR           |
|          |                  | Advanced CCA  | NCT03427242 (phase II)       | Recruiting                                                   | PFS           |
|          |                  |               | NCT04642664 (phase II) [192] | - Promising anti-tumor activity<br>- Acceptable tolerability | PFS, ORR      |
|          |                  |               | NCT03609489 (phase II)       | Unknown                                                      | PFS           |
|          |                  | Advanced iCCA | NCT04834674 (phase II)       | Not yet recruiting                                           | ORR, PFS      |
|          |                  |               | NCT04454905 (phase II)       | Recruiting                                                   | PFS           |

PFS: progression free survival; OS: overall survival; MTD: maximum tolerated dose; DLT: dose limiting toxicity; ORR: objective response rate; RPTD: recommended phase two dose; TEAE: treatment-emergent adverse events; DCR: disease control rate; TTP: time to progression.

**Table S5.** Overview of current and ongoing clinical trials for targeted therapies including multikinase inhibitors in CCA.

| Drug                          | Target                          | Indication                          | Clinical trial               | Recruitment status / Results                        | Primary endpoint |
|-------------------------------|---------------------------------|-------------------------------------|------------------------------|-----------------------------------------------------|------------------|
| <b>Multikinase inhibitors</b> |                                 |                                     |                              |                                                     |                  |
| Ponatinib                     | Multi-tyrosine kinase inhibitor | Advanced CCA                        | NCT02265341 (phase II)       | Promising anti-tumor activity                       | ORR              |
|                               |                                 | Solid tumors                        | NCT02272998 (phase II)       | Recruiting                                          | ORR              |
| Pazopanib                     | Multi-kinase inhibitor          | Advanced solid tumors including CCA | NCT01438554 (phase I) [109]  | Terminated due to low response rate                 | MTD, TAES        |
|                               |                                 | Advanced CCA                        | NCT01855724 (phase II) [193] | Terminated due to low response rate                 | ORR              |
| Sorafenib                     | Multi-kinase inhibitor          | Advanced CCA                        | NCT00919061 (phase II) [144] | No increase in efficacy compared to historical data | PFS              |
|                               |                                 |                                     | NCT00661830 (phase II) [145] | No increase in efficacy compared to historical data | PFS              |
|                               |                                 | Advanced CCA, gallbladder cancer    | NCT01093222 (phase II)       | Completed                                           | PFS              |

|              |                                 |                                           |                                |                                                            |                |
|--------------|---------------------------------|-------------------------------------------|--------------------------------|------------------------------------------------------------|----------------|
|              |                                 | Advanced pancreatic and biliary carcinoma | NCT00634751 (phase I/II)       | Completed                                                  | ORR            |
|              |                                 | Advanced CCA, gallbladder cancer          | NCT00238212 (phase II)         | Completed                                                  | ORR            |
|              |                                 | Advanced eCCA, gallbladder cancer         | NCT02836847 (phase II)         | Recruiting                                                 | PFS            |
|              |                                 |                                           | NCT03768375 (phase II)         | Recruiting                                                 | PFS            |
| Vandetanib   | Multi-kinase inhibitor          | Advanced CCA                              | NCT00753675 (phase II) [194]   | No improvement in PFS                                      | PFS            |
| Cabozantinib | Multi-kinase inhibitor          | Advanced CCA, HCC                         | NCT01954745 (phase II) [121]   | - Limited activity<br>- Significant toxicity               | PFS            |
|              |                                 |                                           | NCT02496208                    | Active, not recruiting                                     | RPTD, TEAE     |
|              |                                 |                                           | NCT02386397 (phase I/II) [195] | Acceptable tolerability                                    | DLT            |
|              |                                 |                                           | NCT02053376 (phase II) [146]   | Promising anti-tumor activity                              | PFS            |
| Regorafenib  | Multi-kinase inhibitor          | Advanced CCA                              | NCT02115542 (phase II) [147]   | Modest clinical efficacy                                   | OS             |
|              |                                 |                                           | NCT02162914 (phase II) [148]   | Improvement in PFS and tumor control                       | PFS            |
|              |                                 | Solid tumors                              | NCT03475953 (phase I/II)       | Recruiting                                                 | RPTD, ORR      |
|              |                                 |                                           | NCT02966821 (phase II) [196]   | - Moderate clinical efficacy<br>- Tolerable safety profile | PFS            |
| Surufatinib  | Multi-tyrosine kinase inhibitor | Advanced CCA                              | NCT03873532 (phase II/III)     | Recruiting                                                 | OS             |
|              |                                 |                                           | NCT05056116 (phase II)         | Recruiting                                                 | ORR            |
|              |                                 |                                           | NCT05064852                    | Not yet recruiting                                         | PFS            |
|              |                                 |                                           | NCT02579616 [197] (phase II);  | - Tolerable safety profile<br>- Anti-tumor activity        | ORR            |
|              |                                 | Advanced CCA                              | NCT04656249 (phase II)         | Completed                                                  | ORR, PFS       |
|              |                                 |                                           | NCT04211168 (phase II)         | Recruiting                                                 | ORR, TEAE      |
| Lenvatinib   | Multi-tyrosine kinase inhibitor | Solid tumors including CCA                | NCT03797326 (phase II)         | Active, not recruiting                                     | ORR, TEAE      |
|              |                                 |                                           | NCT04976634 (phase II)         | Recruiting                                                 | DLT, TEAE, ORR |
|              |                                 | Unresectable iCCA                         | NCT04527679 (phase II)         | Not yet recruiting                                         | ORR            |
|              |                                 | Advanced CCA                              | NCT04550624 (phase II)         | Recruiting                                                 | ORR            |

|               |                                                                    |                                                  |                         |                        |               |
|---------------|--------------------------------------------------------------------|--------------------------------------------------|-------------------------|------------------------|---------------|
|               |                                                                    | Advanced iCCA                                    | NCT04361331 (phase II)  | Active, not recruiting | ORR           |
|               |                                                                    |                                                  | NCT03951597 (phase II); | Active, not recruiting | ORR           |
|               |                                                                    | Advanced CCA                                     | NCT03895970 (phase II)  | Recruiting             | ORR, DCR, PFS |
| Larotrectinib | Selective tyrosin kinase inhibitor of tropomyosin receptor kinases | Solid tumors including CCA with NTRK gene fusion | NCT02576431 (phase II)  | Recruiting             | ORR           |
| Entrectinib   | Selective tyrosin kinase inhibitor of tropomyosin receptor kinases | Solid tumors including CCA with NTRK gene fusion | NCT02568267 (phase II)  | Recruiting             | ORR           |

PFS: progression free survival; OS: overall survival; MTD: maximum tolerated dose; DLT: dose limiting toxicity; ORR: objective response rate; RPTD: recommended phase two dose; TEAE: treatment-emergent adverse events; DCR: disease control rate; TTP: time to progression.

**Table S6.** Overview of current and ongoing clinical trials for therapies targeting the MET, notch, and chromatin remodeling pathways in CCA.

| Drug                           | Target                    | Indication                                              | Clinical trial                     | Recruitment status / Results                                        | Primary endpoint    |
|--------------------------------|---------------------------|---------------------------------------------------------|------------------------------------|---------------------------------------------------------------------|---------------------|
| <b>MET signaling pathway</b>   |                           |                                                         |                                    |                                                                     |                     |
| Tivantinib (ARQ 197)           | Selective c-MET inhibitor | Advanced solid tumors including CCA                     | NCT00874042 (phase I) [120]        | Improved response or stable disease in combination with gemcitabine | MTD, RPTD           |
| Merestinib                     | MET inhibitor             | Advanced CCA                                            | NCT03027284 (phase I) [198]        | Well tolerability                                                   | DLT                 |
|                                |                           |                                                         | NCT02711553 (phase II)             | Active, not recruiting                                              | PFS                 |
| <b>Chromatin remodeling</b>    |                           |                                                         |                                    |                                                                     |                     |
|                                |                           | CCA, renal cell carcinoma, uveal melanoma, mesothelioma | NCT03207347 (phase II)             | Active, not recruiting                                              | ORR                 |
| Niraparib                      | PARP1 inhibitor           | Multiple carcinomas including CCA                       | NCT04779151 (phase II)             | Not yet recruiting                                                  | ORR                 |
|                                |                           | Solid tumors including CCA                              | NCT04178460 (phase I)              | Recruiting                                                          | DLT, MTD, RPTD, ORR |
|                                |                           |                                                         | NCT04764084 (phase I)              | Not yet recruiting                                                  | DLT                 |
|                                |                           | Advanced CCA                                            | NCT04895046 (phase II; recruiting) | Recruiting                                                          | PFS                 |
| <b>Notch signaling pathway</b> |                           |                                                         |                                    |                                                                     |                     |
| CB-103                         | pan-Notch inhibitor       | Advanced solid tumors including CCA                     | NCT03422679 (phase I/II)           | Recruiting                                                          | DLT, ORR            |

PFS: progression free survival; MTD: maximum tolerated dose; DLT: dose limiting toxicity; ORR: objective response rate; RPTD: recommended phase two dose.



**Table S7.** Overview of current and ongoing clinical trials for immunotherapies in CCA

| Drug                       | Target                                          | Indication                          | Clinical trial               | Recruitment status / Results                 | Primary endpoint                |
|----------------------------|-------------------------------------------------|-------------------------------------|------------------------------|----------------------------------------------|---------------------------------|
| <b>Immunotherapy</b>       |                                                 |                                     |                              |                                              |                                 |
| M7824<br>(Bintrafusp Alfa) | Fusion protein targeting PD-L1 and TGF- $\beta$ | Advanced CCA                        | NCT02699515 (phase I)        | Active, not recruiting                       | DLT, TEAE                       |
|                            |                                                 |                                     | NCT03833661 (phase II)       | Active, not recruiting                       | ORR                             |
|                            |                                                 |                                     | NCT04066491 (phase II/III)   | Active, not recruiting                       | DLT, OS                         |
|                            |                                                 | Advanced iCCA                       | NCT04708067 (phase I)        | Recruiting                                   | TEAE                            |
|                            |                                                 | Advanced CCA                        | NCT04727541 (phase II)       | Recruiting                                   | Major pathologic Response (MPR) |
| Atezolizumab               | PD-L1 antibody                                  | Advanced CCA                        | NCT04677504 (phase II) [199] | Active, not recruiting                       | PFS                             |
| Pembrolizumab              | PD-1 antibody                                   | Advanced CCA                        | NCT02703714 (phase II)       | Completed                                    | ORR                             |
|                            |                                                 |                                     | NCT04003636 (phase III)      | Active, not recruiting                       | OS                              |
|                            |                                                 | Advanced solid tumors including CCA | NCT02628067 (phase II) [157] | - 40.9% ORR in a subset of patients with CCA | ORR                             |
|                            |                                                 |                                     |                              | - Good tolerability                          |                                 |
| Nivolumab                  | PD-1 antibody                                   | Multiple tumors including CCA       | NCT02834013 (phase II)       | Recruiting                                   | ORR                             |
| Durvalumab                 | PD-L1 antibody                                  | Advanced CCA                        | NCT03875235 (phase III)      | Completed                                    | OS                              |

PFS: progression free survival; OS: overall survival; DLT: dose limiting toxicity; ORR: objective response rate; TEAE: treatment-emergent adverse events.
